# Supplementary material for: De Novo Assembly and Characterization of the Transcriptome of the Chinese Medicinal Herb, Gentiana rigescens
Source: MDPI journal article supplement (doi:10.3390/ijms160511550), 2015-05-20
Supplement: s1 [file s1]

# Supplementary Information

## Abbreviations:

AACT, acetyl-CoA acetyltransferase;  
HMGS, hydroxymethylglutaryl-CoA synthase;  
HMGR, 3-hydroxy-3-methylglutaryl-coenzyme A reductase;  
MK, mevalonate kinase;  
PMK, phosphomevalonate kinase;  
MVD, diphosphomevalonate decarboxylase;  
DXS, 1-deoxy-D-xylulose-5-phosphate synthase;  
DXR, 1-deoxy-D-xylulose-5-phosphate reductoisomerase;  
MCT, 2-C-methyl-D-erythritol 4-phosphate cytidyltransferase;  
MCS, 2-C-methyl-D-erythritol 2,4-cyclodiphosphate synthase;  
CMK, 4-diphosphocytidyl-2-C-methyl-D-erythritol kinase;  
HDS, 4-hydroxy-3-methylbut-2-enyl diphosphate synthase;  
IDS, 4-hydroxy-3-methylbut-2-enyldiphosphate reductase (isopentenyl/dimethylallyl diphosphate synthase);  
IDI, isopentenyl-diphosphate delta-isomerase;  
GPPS, geranyl diphosphate synthase;  
CYP450, cytochrome P450;  
G10H, geraniol 10-hydroxylase;  
10HGO, 10-hydroxygeraniol oxidoreductase;  
G8O, geraniol 8-oxidase;  
8-HGO, 8-hydroxygeraniol oxidoreductase;  
IS, iridoid synthase;  
IO, iridoid oxidase;  
7-DLGT, 7-deoxyloganetic acid glucosyltransferase;  
7-DLH, 7-deoxyloganic acid hydroxylase;  
LAMT, loganic acid *O*-methyltransferase;  
SLS, secologanin synthase (TIF).

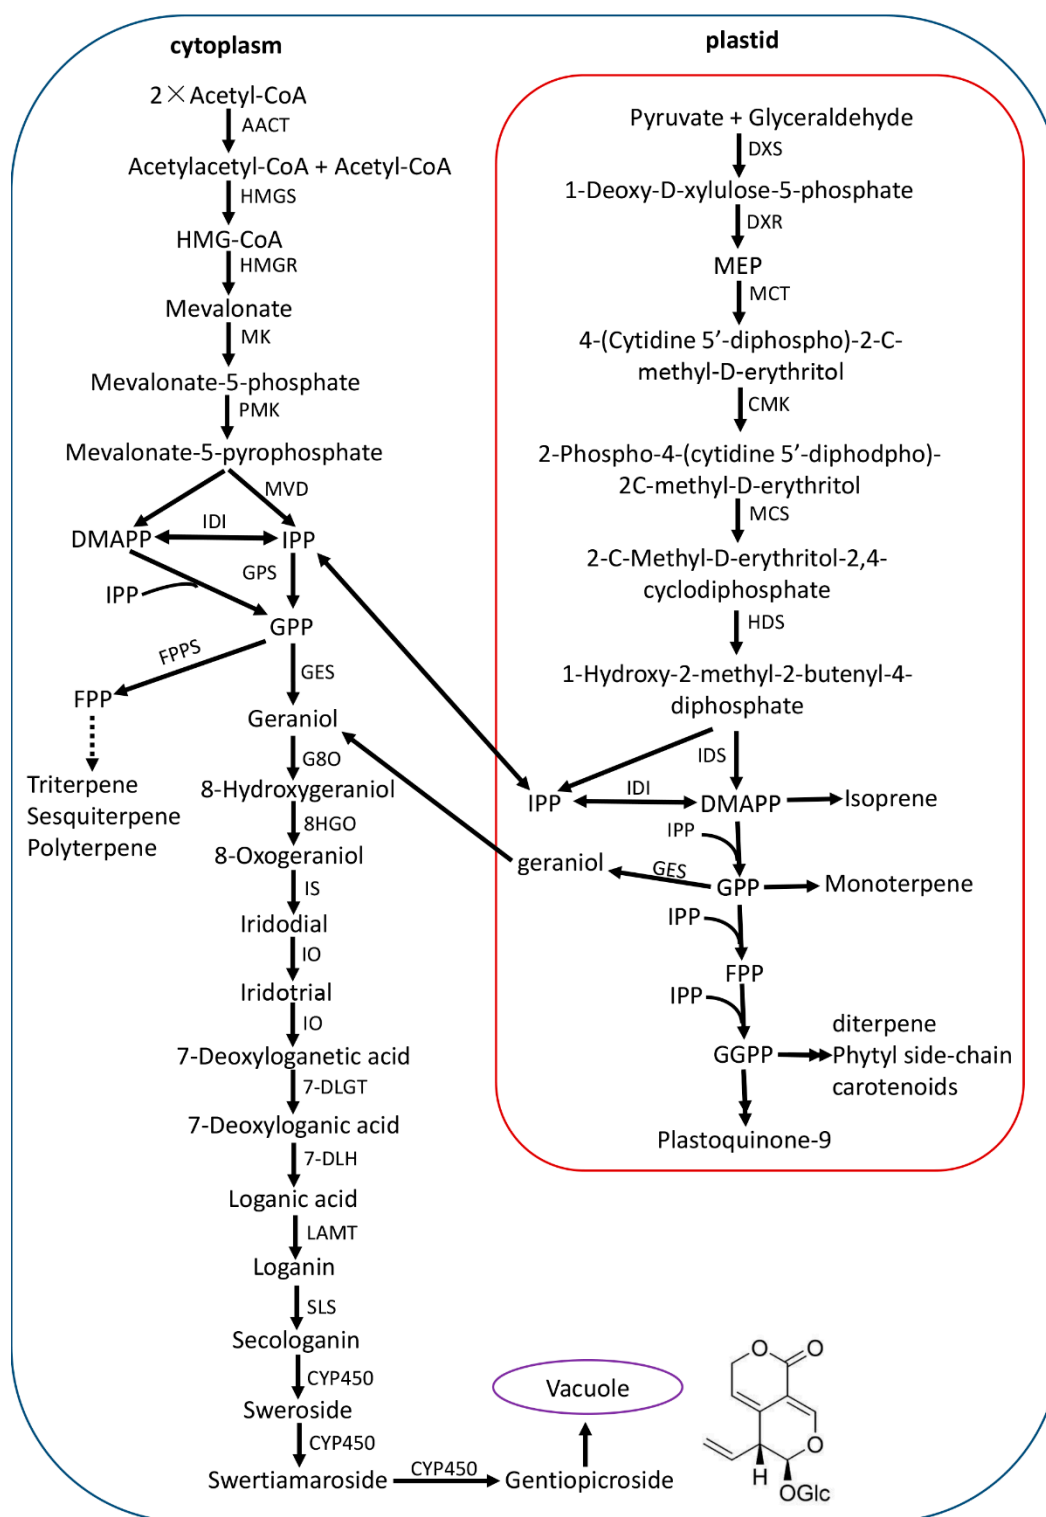

**Figure S1.** Putative biosynthesis pathway of gentiopicroside.
